# Supplementary material for: Insertion reactions of CS2, COS, and PhNCS at thiolate-bridged diiron centers
Source: Royal Society of Chemistry journal article supplement (doi:10.1039/b920144k), 2009-12-23

## Supplementary Information for

# Insertion Reactions of CS<sub>2</sub>, COS, PhNCS at Thiolate-Bridged Diiron Centers

Yanhui Chen, Ying Peng, Pingping Chen, Jinfeng Zhao, Litao Liu, Yang Li, Shuoyi  
Chen, and Jingping Qu\*

State Key Laboratory of Fine Chemicals, School of Chemical Engineering, Dalian University of  
Technology, Dalian 116012, P. R. China

## Contents

**S Table 1** Selected bond distances (Å) and angles (°) for **2a** and **2b**

**S Table 2** Selected bond lengths (Å) and angles (°) for complex **3** and **4**

**S Fig. 1** Cyclic voltammogram of **2a** and ferrocene. The scan rate is 0.100V·s<sup>-1</sup>, and the reference electrode is Ag/AgNO<sub>3</sub>.

**S Fig. 2** Cyclic voltammogram of **2b** and ferrocene. The scan rate is 0.100V·s<sup>-1</sup>, and the reference electrode is Ag/AgNO<sub>3</sub>.

**S Fig. 3** Cyclic voltammogram of **1b**. The scan rate is 0.100V·s<sup>-1</sup>, and the reference electrode is Ag/AgNO<sub>3</sub>.

**S Table 1**

| <b>2a</b>        |          |                  |          |
|------------------|----------|------------------|----------|
| Fe(1)···Fe(2)    | 3.141(1) | Fe(1)–S(1)       | 2.311(2) |
| Fe(1)–S(2)       | 2.269(1) | Fe(1)–S(3)       | 2.184(1) |
| Fe(2)–S(1)       | 2.304(2) | Fe(2)–S(2)       | 2.260(1) |
| Fe(2)–S(4)       | 2.193(1) | S(4)–C(25)       | 1.694(2) |
| S(5)–C(25)       | 1.768(2) | S(5)–C(26)       | 1.813(2) |
| S(3)–C(25)       | 1.687(2) |                  |          |
| S(2)–Fe(1)–S(3)  | 97.0(1)  | S(2)–Fe(1)–S(1)  | 91.4(1)  |
| S(3)–Fe(1)–S(1)  | 92.1(1)  | S(4)–Fe(2)–S(2)  | 96.3(1)  |
| S(4)–Fe(2)–S(1)  | 92.4(1)  | S(2)–Fe(2)–S(1)  | 92.5(1)  |
| Fe(2)–S(2)–Fe(1) | 87.8(1)  | Fe(2)–S(1)–Fe(1) | 85.8(1)  |
| S(3)–C(25)–S(4)  | 129.3(1) | S(3)–C(25)–S(5)  | 112.1(1) |
| S(4)–C(25)–S(5)  | 118.8(1) |                  |          |
| <b>2b</b>        |          |                  |          |
| Fe(1)···Fe(2)    | 3.350(1) | Fe(1)–S(1)       | 2.273(1) |
| Fe(1)–S(2)       | 2.253(1) | Fe(1)–S(3)       | 2.179(1) |
| Fe(2)–S(1)       | 2.264(1) | Fe(2)–S(2)       | 2.255(1) |
| Fe(2)–S(4)       | 2.162(1) | S(3)–C(23)       | 1.704(3) |
| S(4)–C(23)       | 1.677(3) | S(5)–C(23)       | 1.764(2) |
| S(3)–Fe(1)–S(2)  | 98.3(1)  | S(3)–Fe(1)–S(1)  | 99.0(1)  |
| S(2)–Fe(1)–S(1)  | 79.7(1)  | S(4)–Fe(2)–S(2)  | 97.9(1)  |
| S(4)–Fe(2)–S(1)  | 98.9(1)  | S(2)–Fe(2)–S(1)  | 79.9(1)  |
| Fe(2)–S(1)–Fe(1) | 95.2(1)  | Fe(1)–S(2)–Fe(2) | 96.0(1)  |
| S(4)–C(23)–S(3)  | 129.4(1) | S(4)–C(23)–S(5)  | 119.5(1) |
| S(3)–C(23)–S(5)  | 111.3(1) |                  |          |

**S Table 2**

| <b>3</b>                       |          |                                |          |
|--------------------------------|----------|--------------------------------|----------|
| Fe(1)···Fe(1) <sup>#1</sup>    | 3.328(1) | Fe(1)–S(2)                     | 2.135(1) |
| S(1)–Fe(1) <sup>#1</sup>       | 2.296(1) | S(2)–S(2) <sup>#1</sup>        | 2.033(1) |
| S(2)–Fe(1)–S(1)                | 93.6(1)  | Fe(1)–S(1)–Fe(1) <sup>#1</sup> | 93.0(1)  |
| S(2) <sup>#1</sup> –S(2)–Fe(1) | 107.7(1) | S(1)–Fe(1)–S(1) <sup>#1</sup>  | 76.6(1)  |
| <b>4</b>                       |          |                                |          |
| Fe(1)–N(1)                     | 1.989(5) | Fe(1)–S(2)                     | 2.192(1) |
| Fe(1)–S(3)                     | 2.327(2) | S(1)–C(19)                     | 1.760(5) |
| S(1)–C(21)                     | 1.821(7) | C(19)–N(1)                     | 1.309(7) |
| C(11)–N(1)                     | 1.417(8) | C(19)–S(3)                     | 1.711(6) |
| N(1)–Fe(1)–S(2)                | 96.4(1)  | N(1)–Fe(1)–S(3)                | 70.2(1)  |
| S(2)–Fe(1)–S(3)                | 99.3(1)  | C(19)–S(1)–C(21)               | 103.2(3) |
| C(19)–S(3)–Fe(1)               | 77.8(2)  | N(1)–C(19)–S(3)                | 110.7(4) |
| N(1)–C(19)–S(1)                | 124.5(4) | S(3)–C(19)–S(1)                | 124.7(3) |
| C(19)–N(1)–Fe(1)               | 101.0(4) |                                |          |

**S Fig. 1**

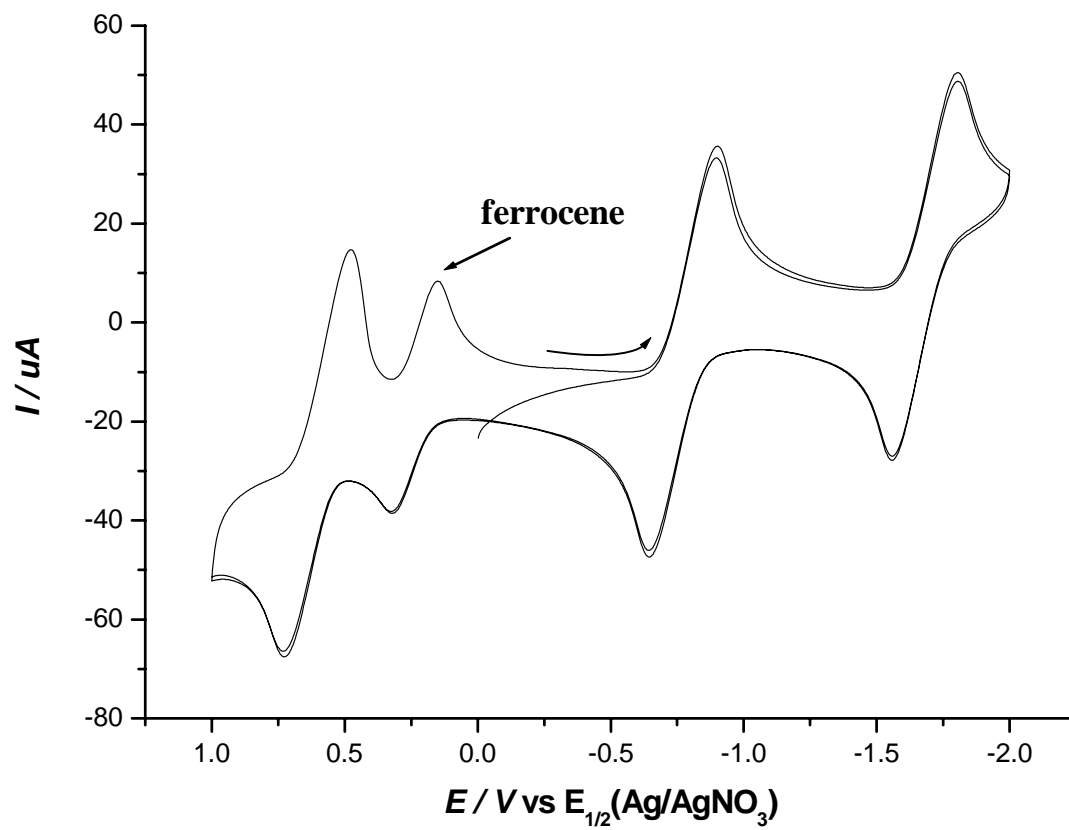

**S Fig. 2**

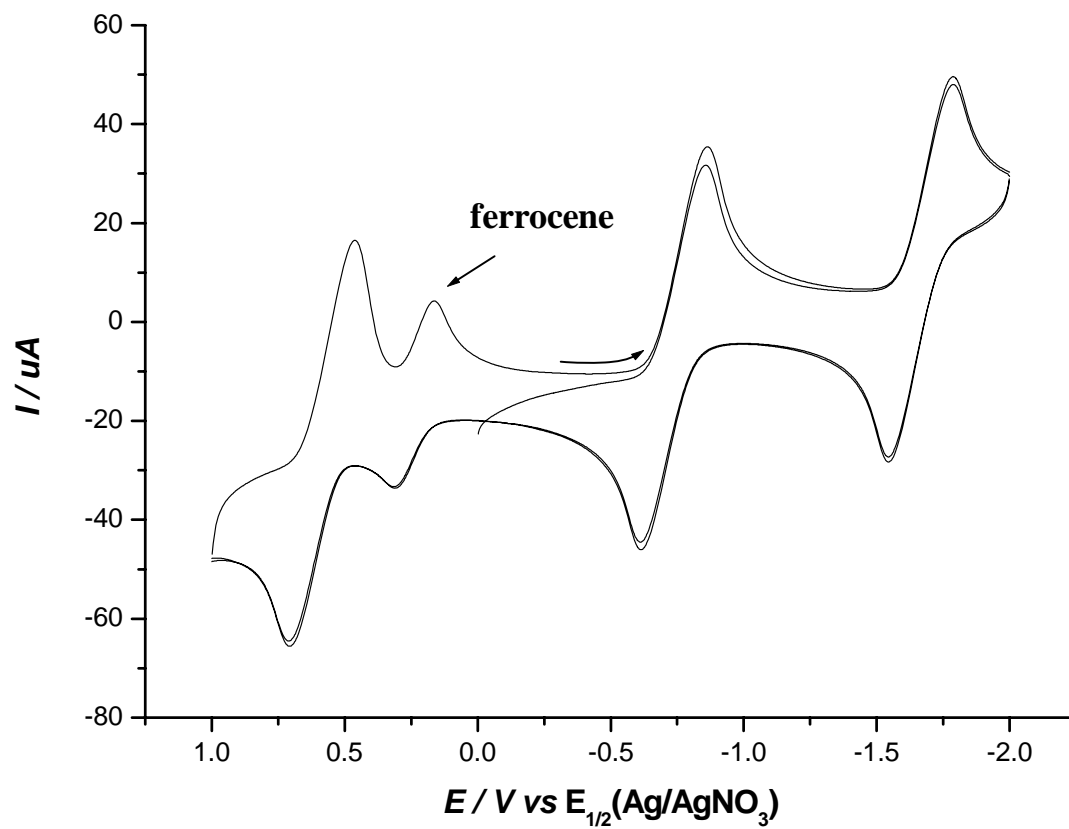

**S Fig. 3**

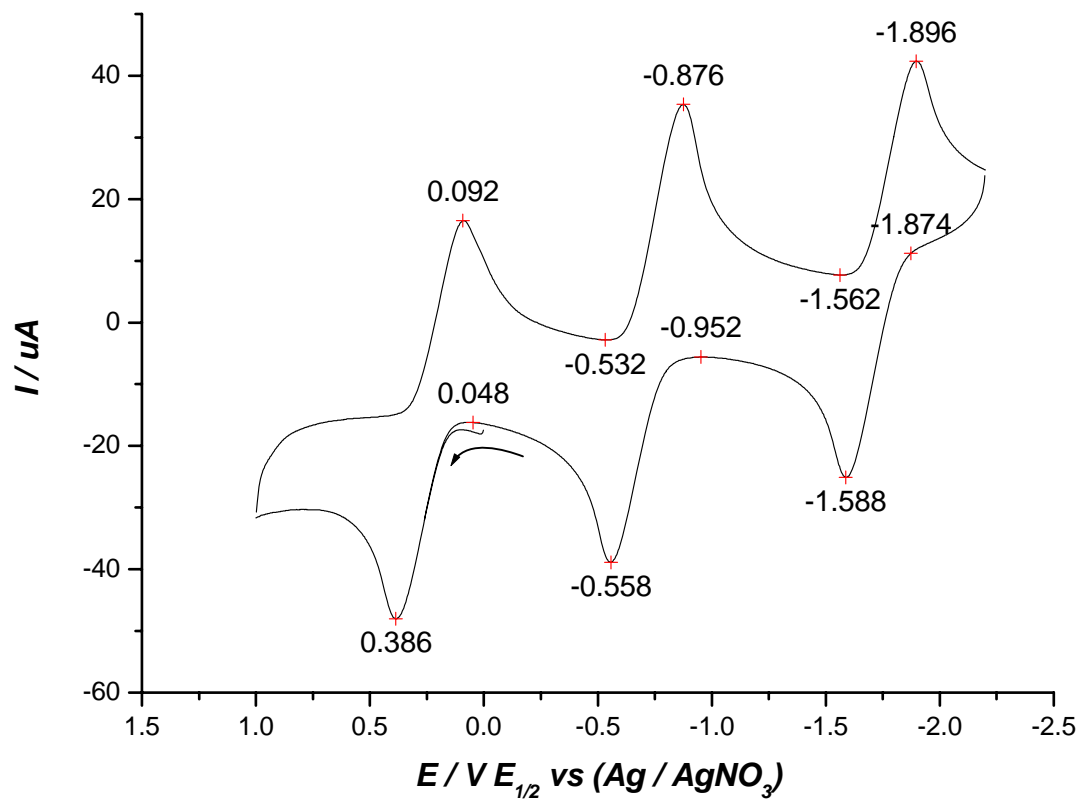

Supplement: b920144k.pdf [file b920144k.pdf]
